# Supplementary material for: Family conflict and lower morning cortisol in adolescents and adults: modulation of puberty
Source: PubMed Central journal article supplement (PMC4772378; doi:10.1038/srep22531), 2016-03-01
Supplement: srep22531-s1.pdf [file srep22531-s1.pdf]

# Family conflict and lower morning cortisol in adolescents and adults: modulation of puberty

## Short title: Family conflict and morning cortisol

Jihui Zhang<sup>1,2</sup>, Siu-Ping Lam<sup>1</sup>, Alice PS Kong<sup>3</sup>, Ronald CW Ma<sup>3</sup>, Shirley Xin Li<sup>4</sup>, Joey WY Chan<sup>1</sup>, Mandy WM Yu<sup>1</sup>, Junying Zhou<sup>1</sup>, Michael HM Chan<sup>5</sup>, Chung-Shun Ho<sup>5</sup>, Albert M Li<sup>6</sup>, Xiangdong Tang<sup>7</sup>, Yun-Kwok Wing<sup>1,2\*</sup>

<sup>1</sup>Department of Psychiatry, Faculty of Medicine, The Chinese University of Hong Kong, Hong Kong SAR, China;

<sup>2</sup>Shenzhen Research Institute, The Chinese University of Hong Kong;

<sup>3</sup>Department of Medicine and Therapeutics, Faculty of Medicine, The Chinese University of Hong Kong, Hong Kong SAR, China;

<sup>4</sup>Department of Psychology, The University of Hong Kong, Pokfulam Road, Hong Kong SAR, China

<sup>5</sup>Department of Chemical Pathology, Faculty of Medicine, The Chinese University of Hong Kong, Hong Kong SAR, China;

<sup>6</sup>Department of Paediatrics, Faculty of Medicine, The Chinese University of Hong Kong, Hong Kong SAR, China;

<sup>7</sup>Sleep Medicine Center, Mental Health Center, West China Hospital, Sichuan University, Chengdu, China.

Supplementary table 1: Associations of diurnal cortisol levels with family conflict in adults

|                                    | Coefficient | Standard error | Z value | P value |
|------------------------------------|-------------|----------------|---------|---------|
| Awakening salivary Cortisol 0 min  | -1.28       | .78            | -1.65   | 0.10    |
| Awakening salivary Cortisol 30 min | -2.70       | .97            | -2.79   | 0.005*  |
| Awakening salivary Cortisol 60 min | -1.58       | .67            | -2.35   | 0.019*  |
| Awakening salivary Cortisol 90 min | -1.00       | .56            | -1.78   | 0.075   |
| Salivary Cortisol at noon          | .06         | .46            | 0.14    | 0.89    |
| Salivary Cortisol at 4 pm          | -.29        | .56            | -0.52   | 0.61    |
| Salivary Cortisol at 10 pm         | -.52        | .29            | -1.80   | 0.07    |
| AUC <sub>g</sub> 30 min (nmol/l)   | -1.89       | .64            | -2.94   | 0.003*  |
| AUC <sub>g</sub> 60 min (nmol/l)   | -3.90       | 1.32           | -2.96   | 0.003*  |
| AUC <sub>g</sub> 90 min (nmol/l)   | -5.24       | 1.81           | -2.89   | 0.004*  |
| AUC <sub>i</sub> 30 min (nmol/l)   | -.40        | .51            | -0.79   | 0.43    |
| AUC <sub>i</sub> 60 min (nmol/l)   | -.93        | 1.39           | -0.67   | 0.50    |
| AUC <sub>i</sub> 90 min (nmol/l)   | -.86        | 2.07           | -0.42   | 0.68    |

Adjustment for age, sex, chronic medication use, chronic medical condition, insomnia, current anxiety disorders, current depressive disorders, season, and wakeup time; weighting for insomnia prevalence in general adults population (10%); \* p < 0.05

Supplementary table 2: Associations of diurnal cortisol levels with family conflict in adolescents at late/post pubertal status

|                                    | Coefficient | Standard error | Z value | P value |
|------------------------------------|-------------|----------------|---------|---------|
| Awakening salivary Cortisol 0 min  | -2.00       | 1.12           | -1.77   | 0.08    |
| Awakening salivary Cortisol 30 min | -4.29       | 1.49           | -2.88   | 0.004*  |
| Awakening salivary Cortisol 60 min | -1.83       | 1.15           | -1.59   | 0.11    |
| Awakening salivary Cortisol 90 min | -.65        | .88            | -0.74   | 0.46    |
| Salivary Cortisol at noon          | -1.33       | .52            | -2.55   | 0.011*  |
| Salivary Cortisol at 4 pm          | -.37        | .53            | -0.69   | 0.49    |
| Salivary Cortisol at 10 pm         | -.37        | .37            | -1.00   | 0.32    |
| AUC <sub>g</sub> 30 min (nmol/l)   | -2.30       | 1.15           | -2.00   | 0.046*  |
| AUC <sub>g</sub> 60 min (nmol/l)   | -4.11       | 2.10           | -1.95   | 0.051   |
| AUC <sub>g</sub> 90 min (nmol/l)   | -5.56       | 2.67           | -2.08   | 0.037*  |
| AUC <sub>i</sub> 30 min (nmol/l)   | -.52        | .52            | -0.99   | 0.32    |
| AUC <sub>i</sub> 60 min (nmol/l)   | -.73        | 1.49           | -0.49   | 0.62    |
| AUC <sub>i</sub> 90 min (nmol/l)   | .35         | 2.39           | 0.15    | 0.88    |

Adjustment for age, sex, chronic medication use, chronic medical condition, insomnia, current anxiety disorders, current depressive disorders, season, and wakeup time; Weighting for insomnia prevalence in general adolescent population (6%); \*  $p < 0.05$

Supplementary table 3: Associations of diurnal cortisol levels with family conflict in adolescents at pre/early pubertal status

|                                    | Coefficient | Standard error | Z value | P value |
|------------------------------------|-------------|----------------|---------|---------|
| Awakening salivary Cortisol 0 min  | -.38        | 1.36           | -0.28   | 0.78    |
| Awakening salivary Cortisol 30 min | 1.36        | 2.24           | 0.61    | 0.54    |
| Awakening salivary Cortisol 60 min | 1.31        | 1.44           | 0.91    | 0.36    |
| Awakening salivary Cortisol 90 min | 1.50        | 1.04           | 1.45    | 0.15    |
| Salivary Cortisol at noon          | .84         | 1.08           | 0.79    | 0.43    |
| Salivary Cortisol at 4 pm          | 1.30        | .98            | 1.32    | 0.18    |
| Salivary Cortisol at 10 pm         | -.03        | .24            | -0.12   | 0.91    |
| AUC <sub>g</sub> 30 min (nmol/l)   | .09         | .24            | 0.38    | 0.70    |
| AUC <sub>g</sub> 60 min (nmol/l)   | .39         | .49            | 0.81    | 0.42    |
| AUC <sub>g</sub> 90 min (nmol/l)   | .74         | .62            | 1.19    | 0.23    |
| AUC <sub>i</sub> 30 min (nmol/l)   | .10         | .14            | 0.70    | 0.48    |
| AUC <sub>i</sub> 60 min (nmol/l)   | .40         | .41            | 0.98    | 0.33    |
| AUC <sub>i</sub> 90 min (nmol/l)   | .75         | .63            | 1.19    | 0.24    |

Adjustment for age, sex, chronic medication use, chronic medical condition, insomnia, current anxiety disorders, current depressive disorders, season, and wakeup time; Weighting for insomnia prevalence in general adolescent population (6%); \*  $p < 0.05$
